# Supplementary material
Source: HighWire-hosted journal article supplement (https://bmjopen.bmj.com/content/7/3/e013041)
Supplement: inline-supplementary-material-1 [file inline-supplementary-material-1.pdf]

## Appendix A

### Survey

#### *Demographics*

1. Age
  - a. 18-49
  - b. 50-64
  - c. 65-80
  - d. >81
2. Sex
  - a. Male
  - b. Female
3. Education
  - a. <high school graduate
  - b. high school graduate or some college
  - c. college graduate or more
4. Annual Household Income
  - a. <10 000 \$
  - b. 10 000 \$ - 30 000 \$
  - c. >30 000 \$
5. Do you have a personal health care provider?
  - a. Yes
  - b. No
6. If yes, are you satisfied with health care provider?
  - a. Yes
  - b. No
7. Did you receive free medication samples in past year?
  - a. Yes
  - b. No
8. Are you currently using prescription medications?
  - a. Yes
  - b. No

#### *Awareness*

9. Are the following present in the exam room, waiting room, or other areas of your physician's' office?
  - a. Drug company advertisements
    1. Yes
    2. No
    3. Don't Know
  - b. Items with drug company logos on them
    1. Yes
    2. No
    3. Don't Know
  - c. Office staff eating lunches paid for by drug companies
    1. Yes
    2. No
    3. Don't Know

- d. Drug reps in the office or waiting room
  - 1. Yes
  - 2. No
  - 3. Don't Know
- e. Patient education materials with drug company logos on them
  - 1. Yes
  - 2. No
  - 3. Don't Know

10. Knowledge of Physician Engagement in a Variety of Activities with Pharmaceutical Companies. Does your doctor \_\_\_?

- a. accepts gift >100\$
  - 1. Yes
  - 2. No
  - 3. Don't Know
  - 4. Don't care
  - 5. Don't know but would want to know
- b. attend drug co. social activities
  - 1. Yes
  - 2. No
  - 3. Don't Know
  - 4. Don't care
  - 5. Don't know but would want to know
- c. go on trips paid by the drug company
  - 1. Yes
  - 2. No
  - 3. Don't Know
  - 4. Don't care
  - 5. Don't know but would want to know
- d. accept gifts <100\$
  - 1. Yes
  - 2. No
  - 3. Don't Know
  - 4. Don't care
  - 5. Don't know but would want to know
- e. give lectures for the drug company
  - 1. Yes
  - 2. No
  - 3. Don't Know
  - 4. Don't care
  - 5. Don't know but would want to know

- f. conduct research for the drug company
  - 1. Yes
  - 2. No
  - 3. Don't Know
  - 4. Don't care
  - 5. Don't know but would want to know
- g. accept drug company meal
  - 1. Yes
  - 2. No
  - 3. Don't Know
  - 4. Don't care
  - 5. Don't know but would want to know
- h. use drug company pens or notepads
  - 1. Yes
  - 2. No
  - 3. Don't Know
  - 4. Don't care
  - 5. Don't know but would want to know

*Belief*

11. Effect of Physician Participation in Various Activities on Patient Trust. How will each of the following affect your level of trust in your physician?

- a. accepts gift >100\$
  - 1. Higher trust
  - 2. No change
  - 3. Lower trust
- b. attend drug co. social activities
  - 1. Higher trust
  - 2. No change
  - 3. Lower trust
- c. go on trips paid by the drug company
  - 1. Higher trust
  - 2. No change
  - 3. Lower trust
- d. accept gifts <100\$
  - 1. Higher trust
  - 2. No change
  - 3. Lower trust
- e. give lectures for the drug company
  - 1. Higher trust
  - 2. No change
  - 3. Lower trust

- f. conduct research for the drug company
  - 1. Higher trust
  - 2. No change
  - 3. Lower trust
- g. accept drug company meal
  - 1. Higher trust
  - 2. No change
  - 3. Lower trust
- h. use drug company pens or notepads
  - 1. Higher trust
  - 2. No change
  - 3. Lower trust

*Attitude*

12. What is your attitudes towards your physician accepting small gifts or meal.

- a. it influences my doctor's prescribing behavior
  - 1. agree
  - 2. Neither agree nor disagree
  - 3. disagree
- b. it's Ok, as long as gifts are of the little monetary value
  - 1. agree
  - 2. Neither agree nor disagree
  - 3. disagree
- c. it's not a problem
  - 1. agree
  - 2. Neither agree nor disagree
  - 3. disagree
- d. It's wrong/unethical
  - 1. agree
  - 2. Neither agree nor disagree
  - 3. disagree
- e. it makes patients wait too long
  - 1. agree
  - 2. Neither agree nor disagree
  - 3. disagree
- f. it underestimates my trust in my doctor
  - 1. agree
  - 2. Neither agree nor disagree
  - 3. disagree

*Attitudes about Various Professionals Accepting Gifts or Meal*

13. How proper do you think it is for each of the following to accept meals or small gifts from those listed?

- a. Judges (from lawyers whose case they are hearing)
  - 1. Not a problem
  - 2.
  - 3. Neutral
  - 4.
  - 5. Wrong/unethical
- b. Professional sports referees (from players whose games they officiate)
  - 1. Not a problem
  - 2.
  - 3. Neutral
  - 4.
  - 5. Wrong/unethical
- c. Politicians (from lobbyists)
  - 1. Not a problem
  - 2.
  - 3. Neutral
  - 4.
  - 5. Wrong/unethical
- d. Doctors (from drug company representatives)
  - 1. Not a problem
  - 2.
  - 3. Neutral
  - 4.
  - 5. Wrong/unethical
- e. Business people (from clients)
  - 1. Not a problem
  - 2.
  - 3. Neutral
  - 4.
  - 5. Wrong/unethical
